# Supplementary material
Source: PubMed Central journal article supplement (PMC2966068)
Supplement: supp_M110.125302_Supplemental_Figure_S2.pdf [file supp_M110.125302_Supplemental_Figure_S2.pdf]

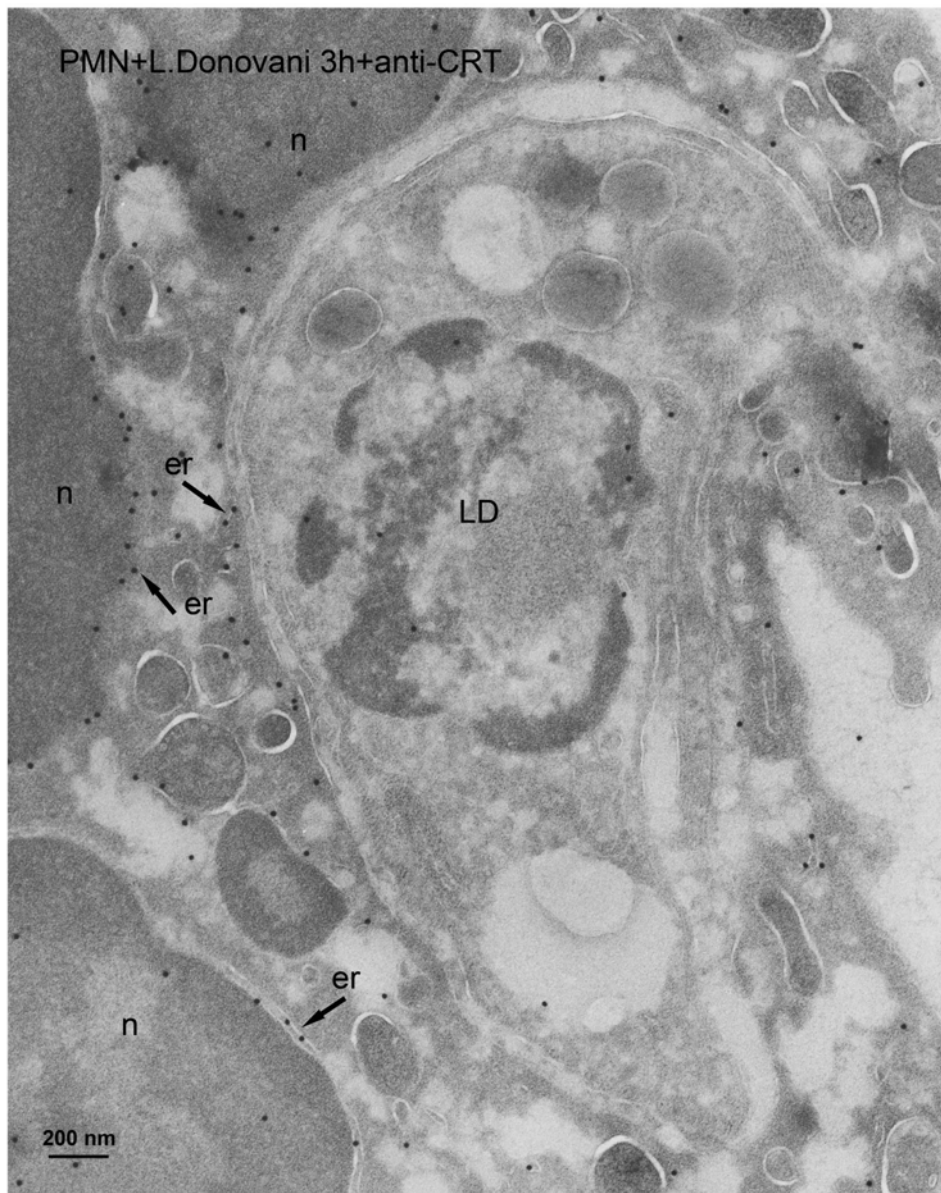

**SUPPLEMENTAL FIGURE S2. Assessment of the contribution of endoplasmic reticulum to the *L. donovani*-containing phagosome.** Cryosections of human polymorphonuclear neutrophils (PMN) incubated with *L. donovani* parasites (LD) for 3 h were immunogold labeled with the endoplasmic reticulum resident protein calreticulin (CRT). The endoplasmic reticulum cisternae (*er*) from the PMN were extensively labeled, while the label associated with phagosome was negligible. The nucleus of the neutrophil is shown, *n*. Images are representative of three independent experiments, and for each experiment about 50 phagosome sections were observed. Bar, 200 nm.
